# Supplementary material for: Effect of Dimeric Disintegrins Isolated from Vipera lebetina obtusa Venom on Glioblastoma Cellular Responses
Source: MDPI journal article supplement (doi:10.3390/cancers15194805), 2023-09-29

## Supplemental Materials

Article

# Effect of Dimeric Disintegrins Isolated from *Vipera lebetina obtusa* Venom on Glioblastoma Cellular Responses

Anna Galicka <sup>1\*</sup>, Łukasz Szoka <sup>2</sup>, Iwona Radziejewska <sup>1</sup>, Cezary Marcinkiewicz <sup>3\*</sup>

<sup>1</sup> Department of Medical Chemistry, Medical University of Białystok, Mickiewicza 2A, 15-222 Białystok, Poland; iwona@umb.edu.pl

<sup>2</sup> Department of Medicinal Chemistry, Medical University of Białystok, Mickiewicza 2D, 15-222 Białystok, Poland; lukasz.szoka@umb.edu.pl

<sup>3</sup> Department of Bioengineering, Temple University CoE, Philadelphia, PA 19406, USA

\* Correspondence: angajko@umb.edu.pl (A.G.);  
cezary.marcinkiewicz@temple.edu (C.M.)

**Figure S1. For Figure 5a, Western blot of  $\alpha 5$  integrin (A) and  $\beta$ -actin (B) in glioblastoma cell lines LBC3, LN18 and LN229 treated with VLO4 disintegrin. The membranes were cut at a height between the 63 and 75 kDa markers and the upper part of the membrane was used to identify integrin  $\alpha 5$  and the lower part for  $\beta$ -actin, which allowed to study the expression of tested and reference proteins under the same conditions and in the same samples. Densitometry values of the protein bands are also shown. lar weight markers**

(A)

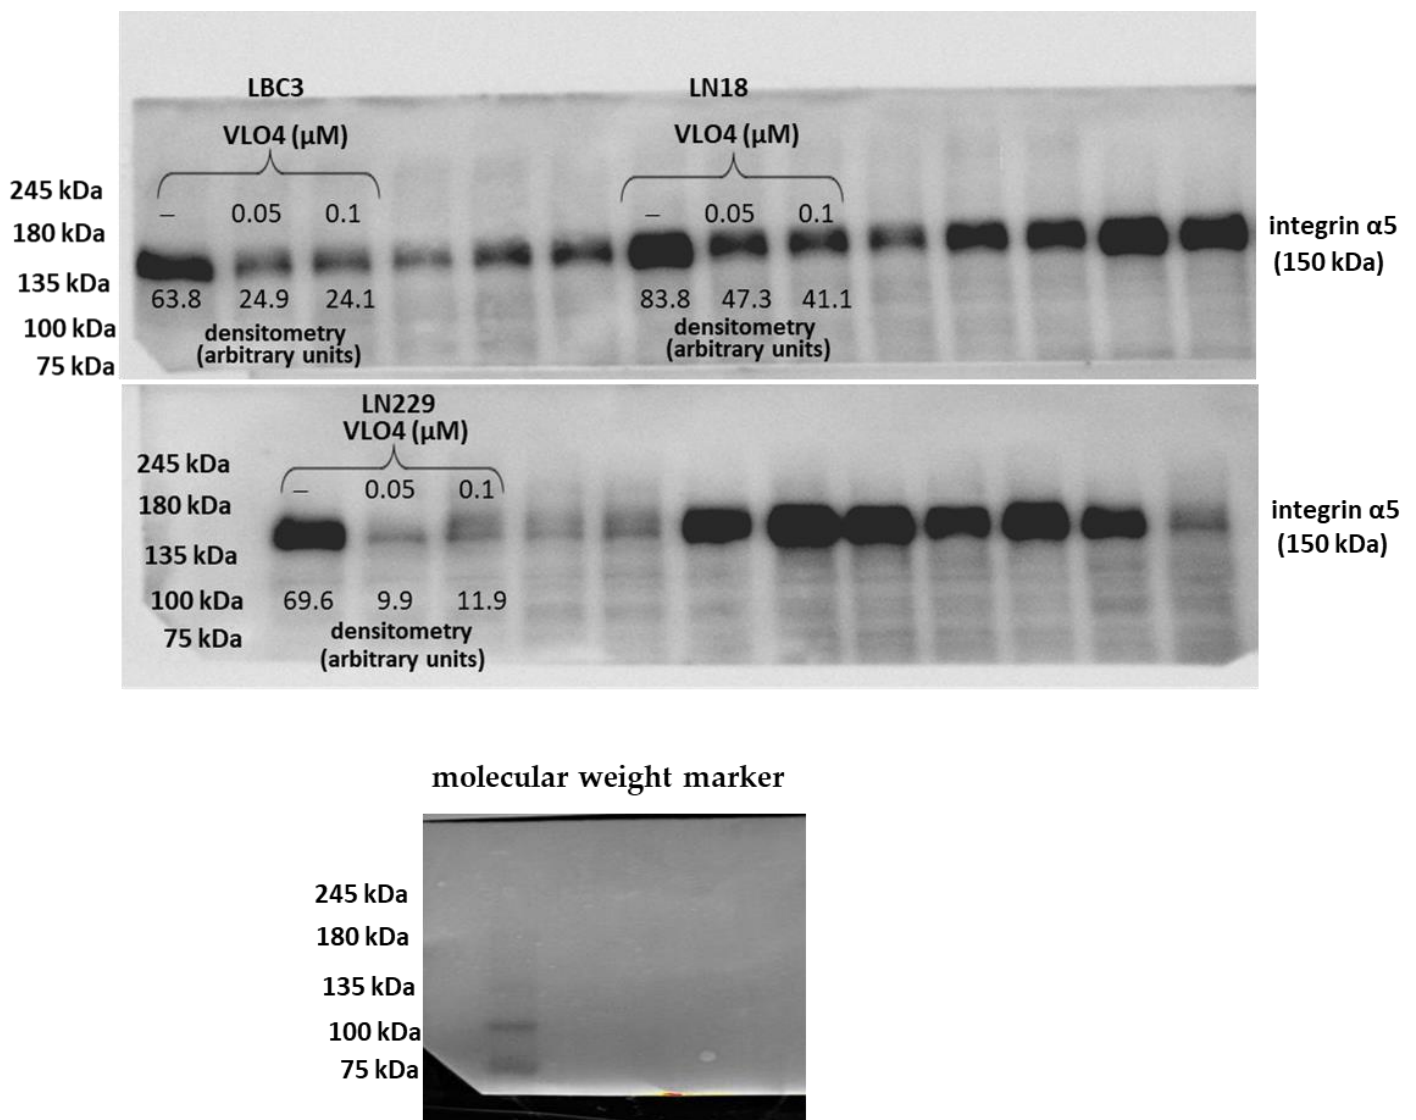

(B)

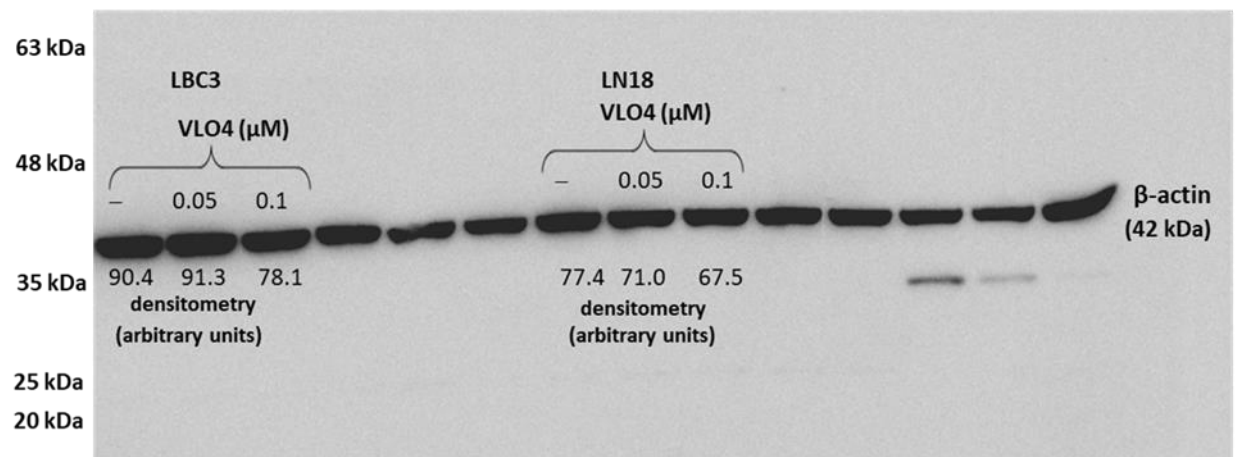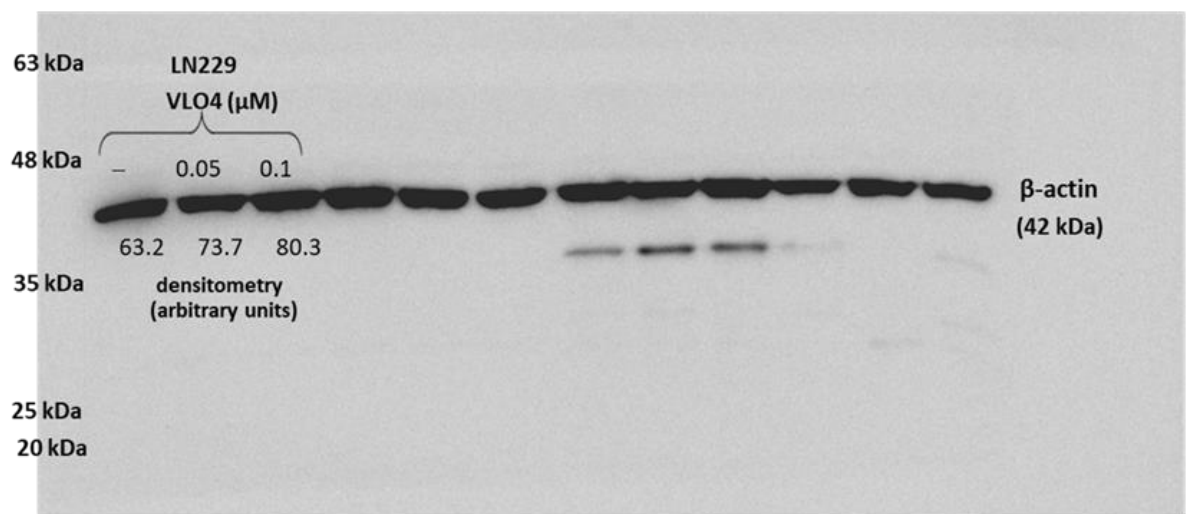

molecular weight marker

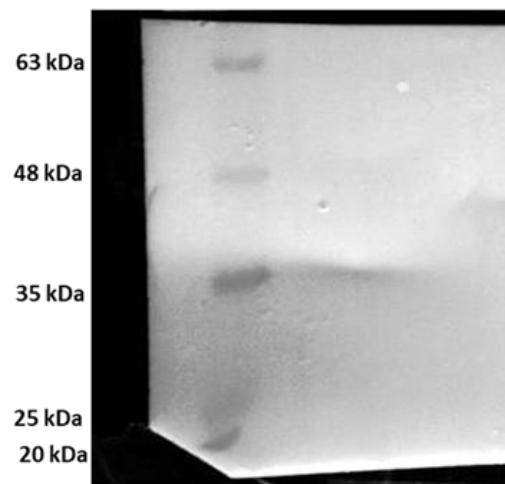

**Figure S2. For Figure 5b, Western blot of integrin  $\beta$ 1 (A) and  $\beta$ -actin (B) in glioblastoma cell lines LBC3, LN18 and LN229 treated with VLO4 disintegrin. The membranes were cut at a height between the 63 and 75 kDa markers and the upper part of the membrane was used to identify integrin  $\beta$ 1 and the lower part for  $\beta$ -actin or another low-molecular tested protein, which allowed to study the expression of tested and reference proteins under the same conditions and in the same samples. Densitometry values of the protein bands and the molecular weight markers are also shown.**

(A)

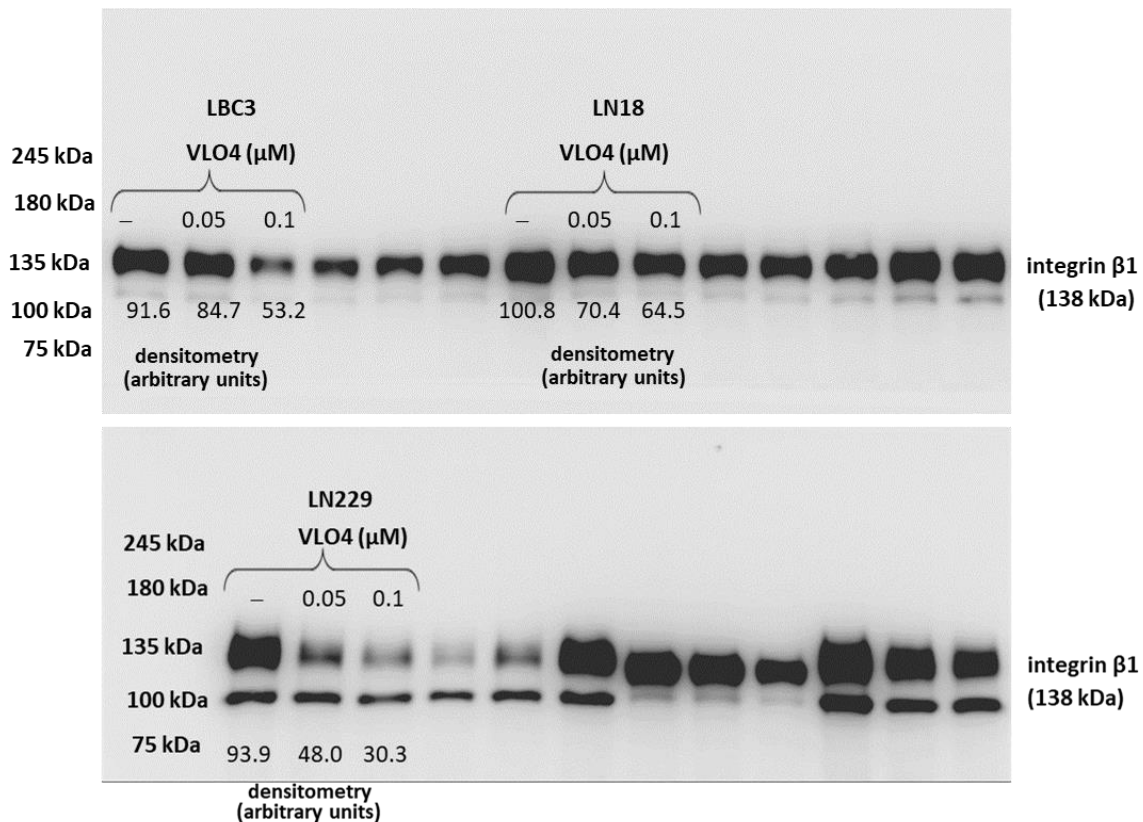

molecular weight marker

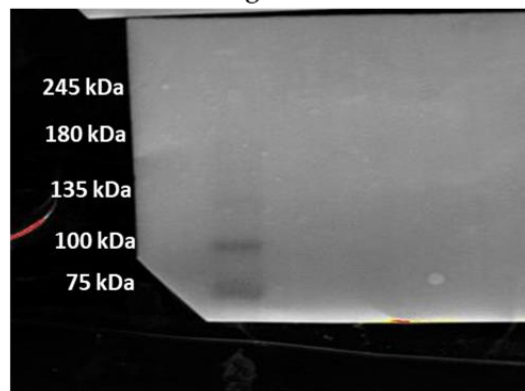

(B)

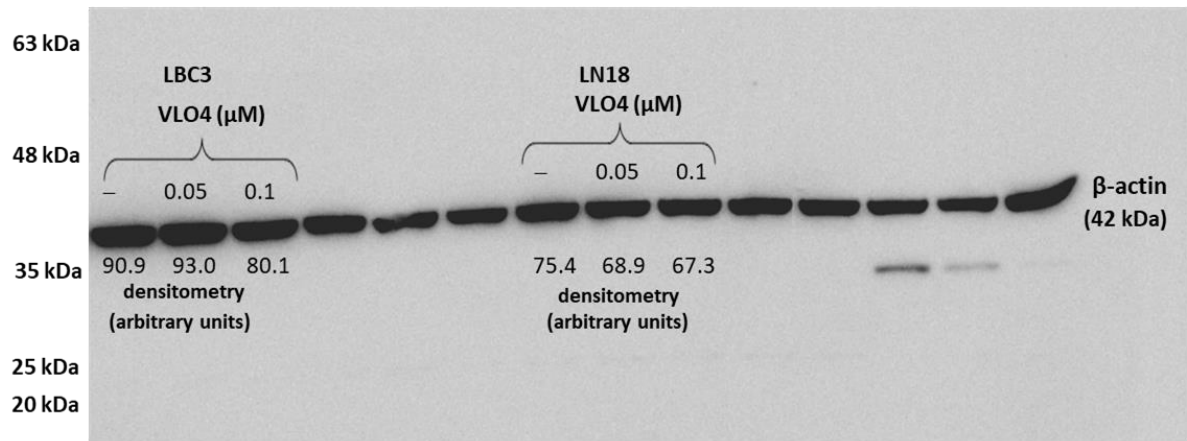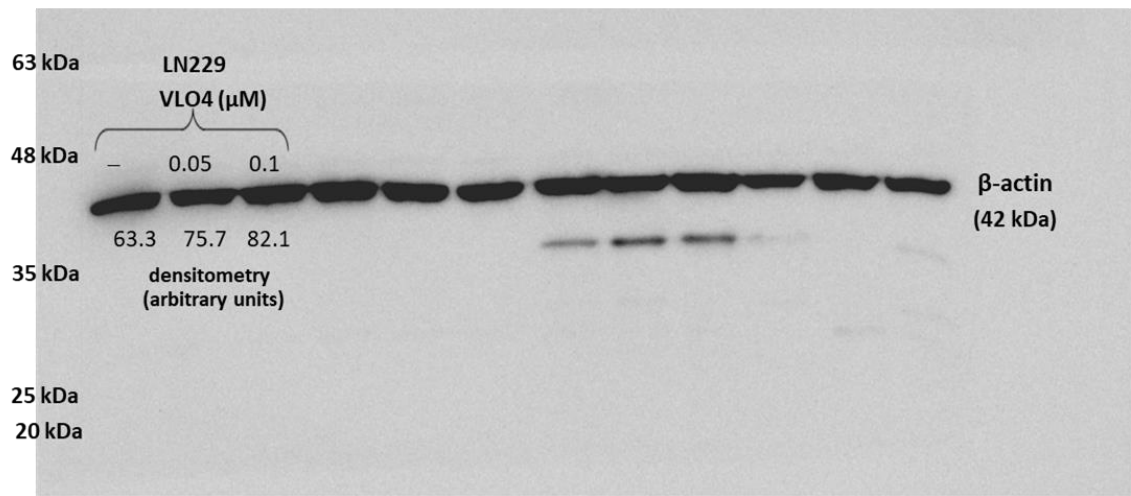

molecular weight marker

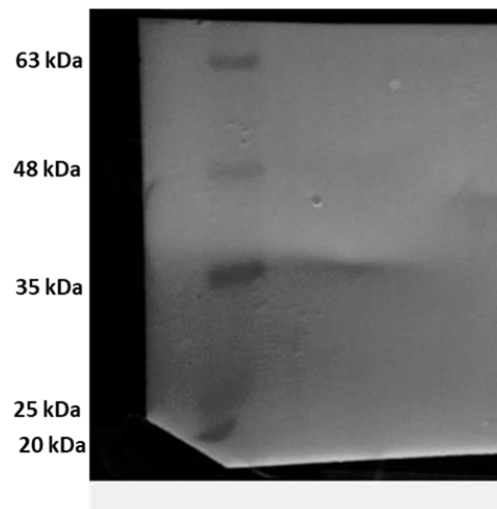

**Figure S3. For Figure 5c, Western blot of integrin  $\alpha 2$  (A) and  $\beta$ -actin (B) in glioblastoma cell lines LBC3, LN18 and LN229 treated with VLO4 disintegrin. The membranes were cut at a height between the 63 and 75 kDa markers and the upper part of the membrane was used to identify integrin  $\alpha 2$  and the lower part for  $\beta$ -actin or another low-molecular tested protein, which allowed to study the expression of tested and reference proteins under the same conditions and in the same samples. Densitometry values of the protein bands and the molecular weight markers are also shown.**

**(A)**

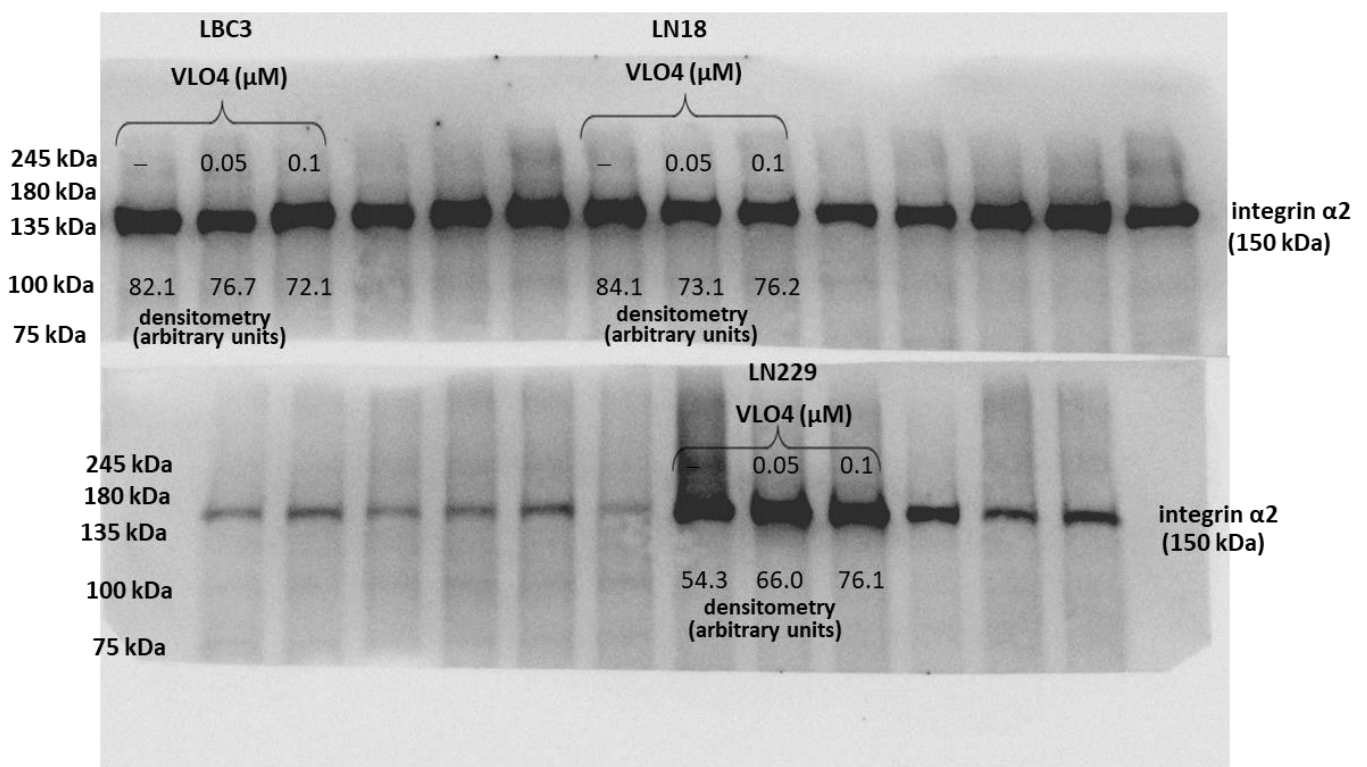

**molecular weight marker**

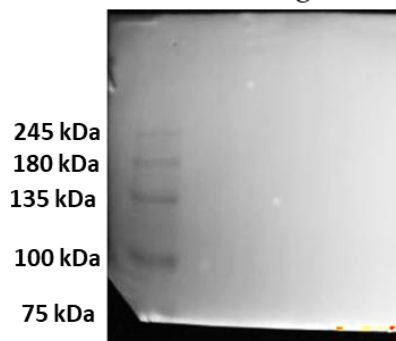

(B)

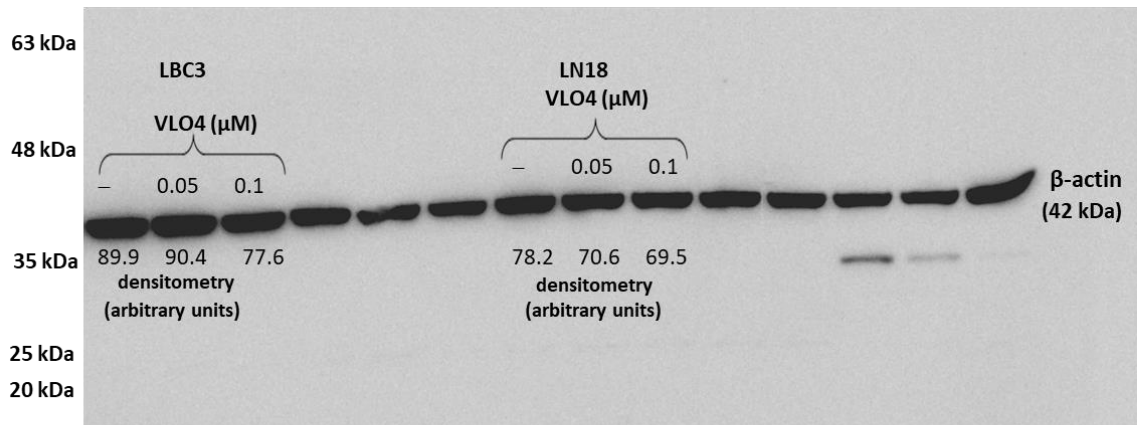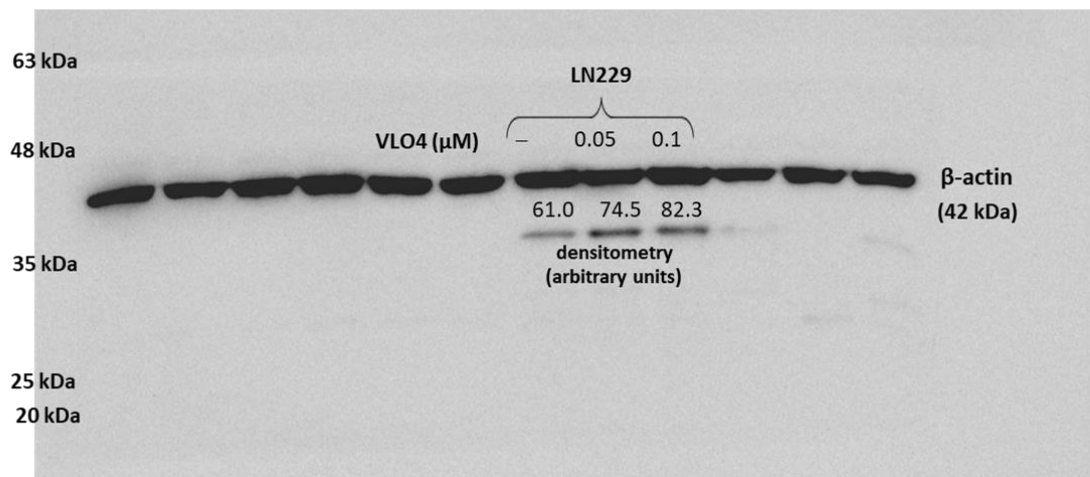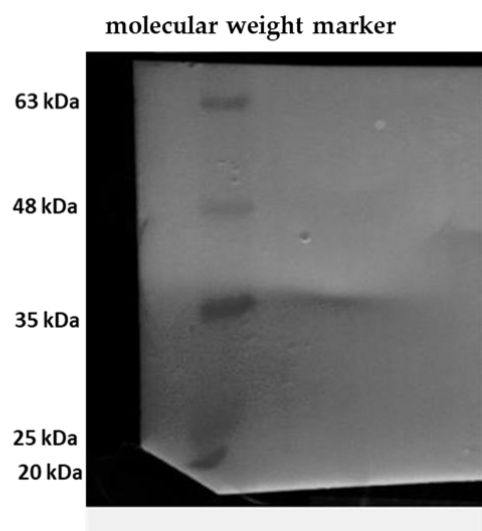



**Figures S4. For Figure 5d,e, Western blot of  $\alpha 9\beta 1$  integrin (A) and  $\beta$ -actin (B) in glioblastoma cell line LN229 treated with VLO4 and VLO5 disintegrins. The membranes were cut at a height between the 63 and 75 kDa markers and the upper part of the membrane was used to identify integrin  $\alpha 9$  and  $\beta$ -1 subunits and the lower part for  $\beta$ -actin or another low-molecular protein, which allowed to study the expression of tested and reference proteins under the same conditions and in the same samples. Densitometry values of the protein bands and the molecular weight are also shown.**

**(A)**

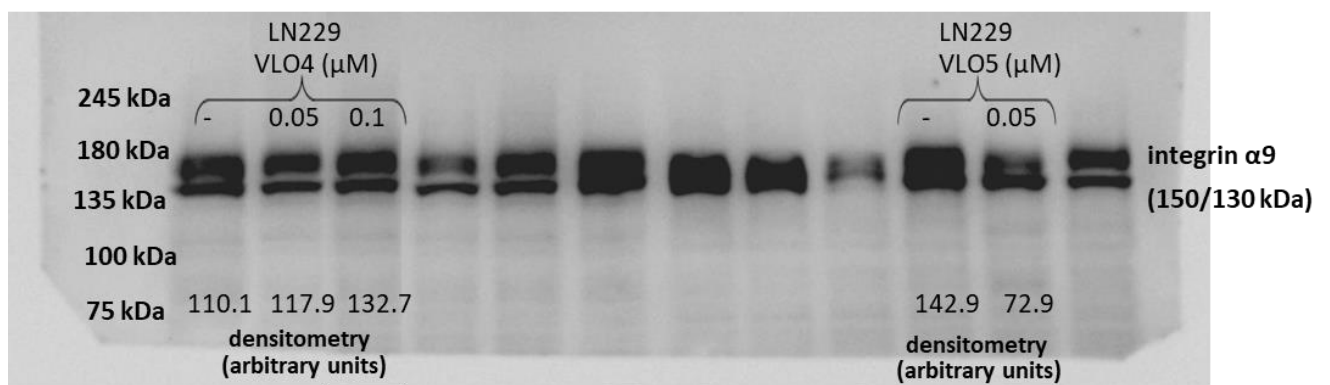

**molecular weight marker**

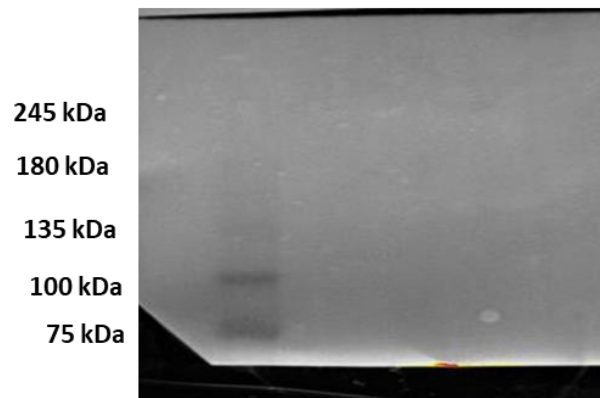



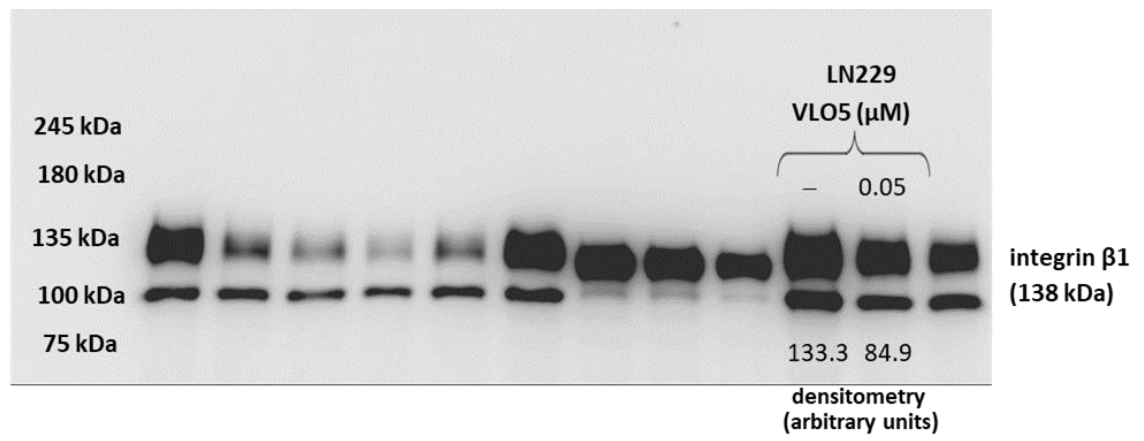

molecular weight marker

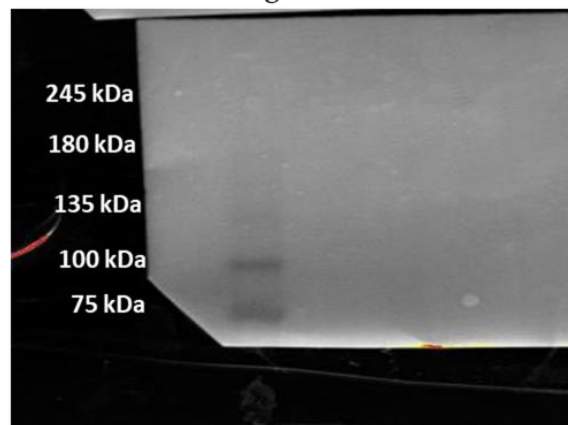

(B)

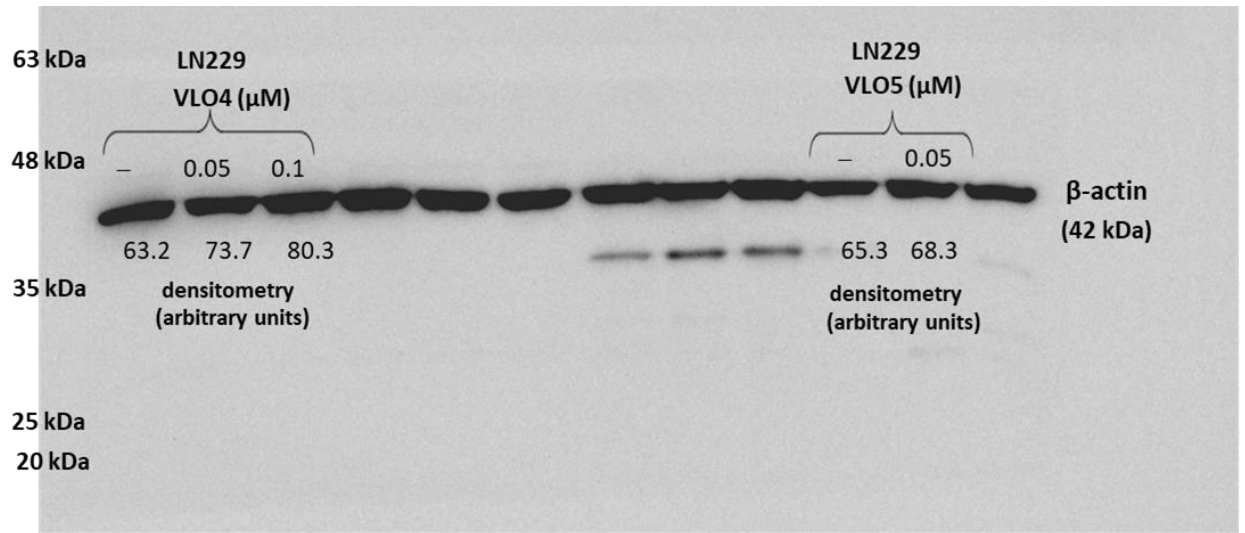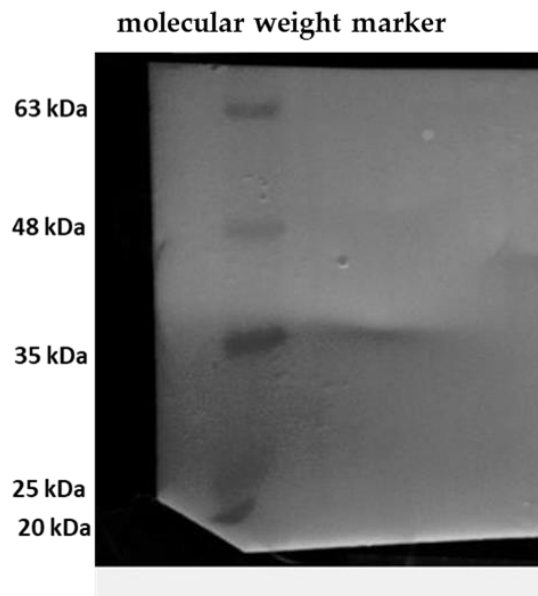

**Figure S5. For Figure 8a, Western blot of Bax (A) and  $\beta$ -actin (B) in glioblastoma cell lines LBC3, LN18 and LN229 treated with VLO4 disintegrin. Densitometry values of the protein bands and the molecular weight markers are also shown.**

**(A)**

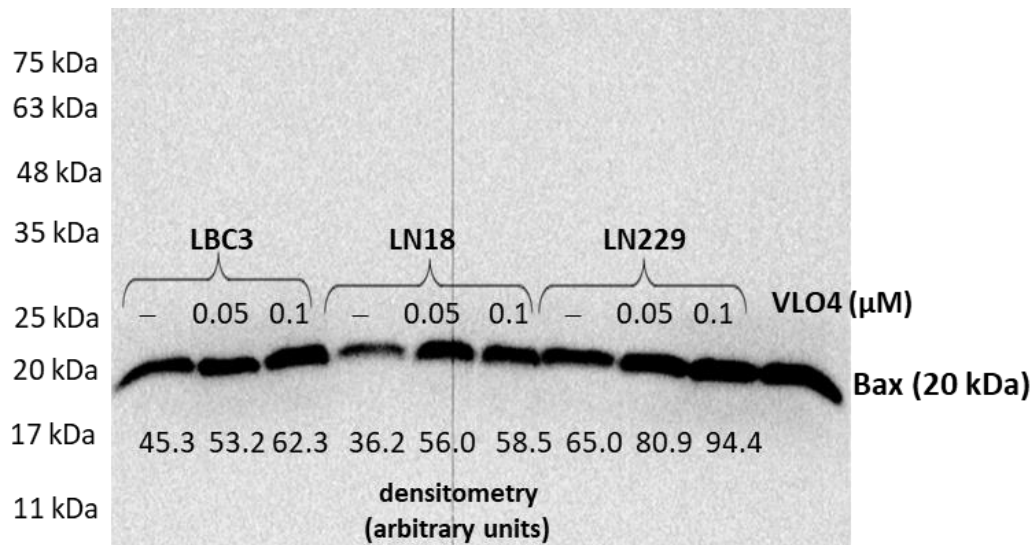

**molecular weight marker**

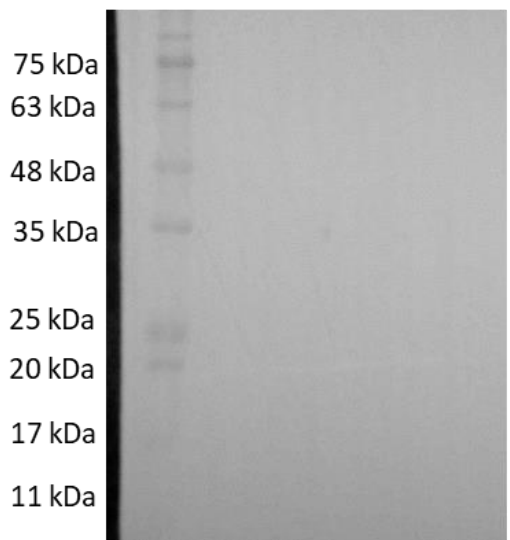

(B)

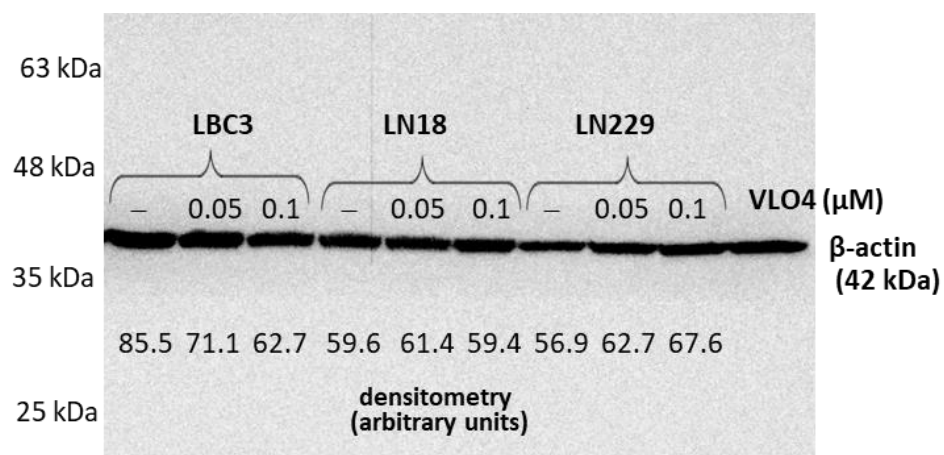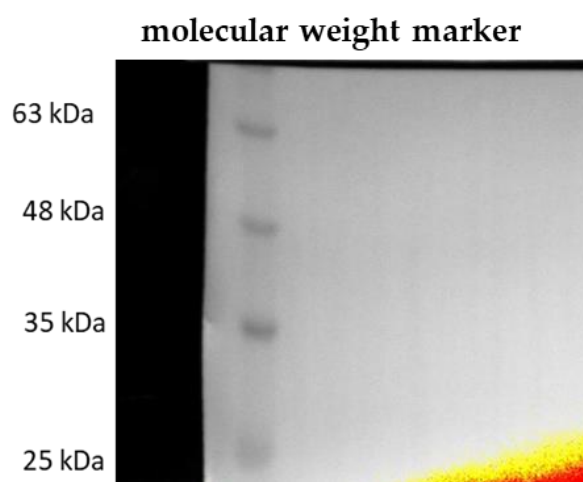

**Figure S6. For Figure 8b, Western blot of cleaved caspase-3 (A) and  $\beta$ -actin (B) in glioblastoma cell lines LBC3, LN18 and LN229 treated with VLO4 disintegrin. The membranes were cut at a height between the 25 and 48 kDa markers and the lower part of the membrane was used to identify cleaved caspase 3 and the upper part for high-molecular tested proteins. Densitometry values of the protein bands and the weight markers are also shown.**

**(A)**

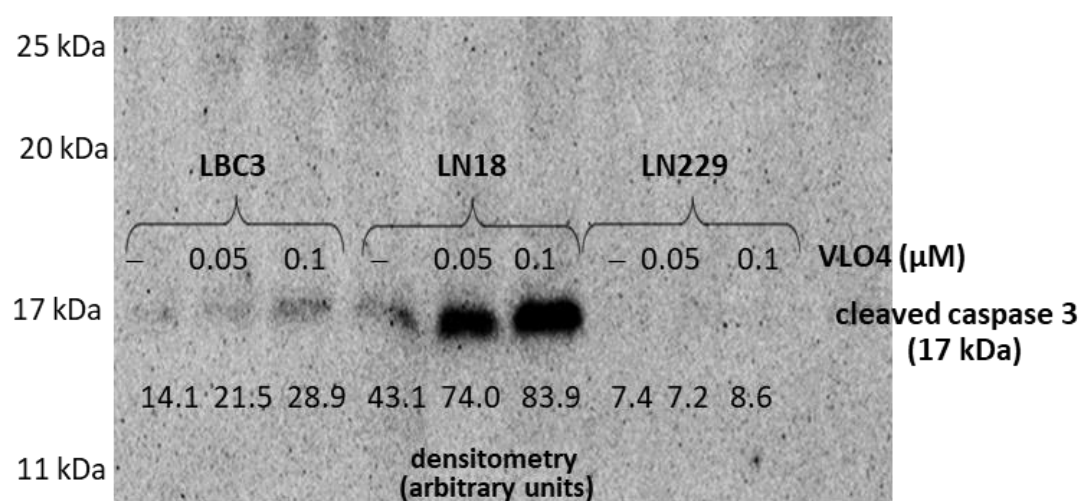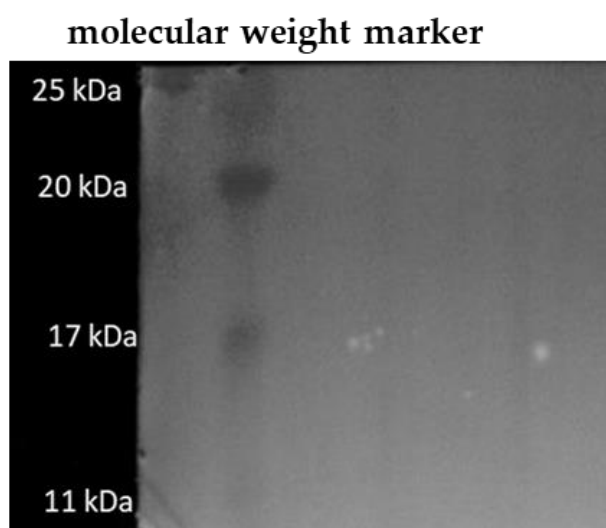

**(B)**

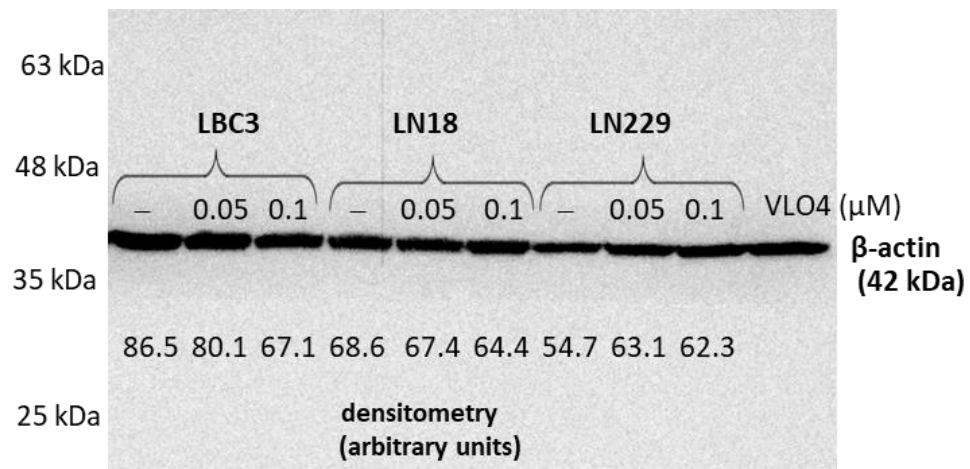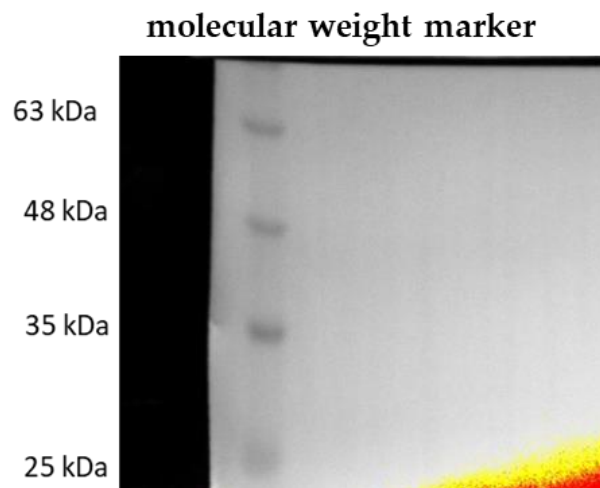

**Figure S7. For Figure 8c, Western blot of Bcl2 (A) and  $\beta$ -actin (B) in glioblastoma cell lines LBC3, LN18 and LN229 treated with VLO4 disintegrin.** The membranes were cut at a height between the 48 and 75 kDa markers and the lower part of the membrane was used to identify Bcl2 and the upper part for another tested high-molecular protein. Densitometry values of the protein bands and the molecular weight markers are also shown.

(A)

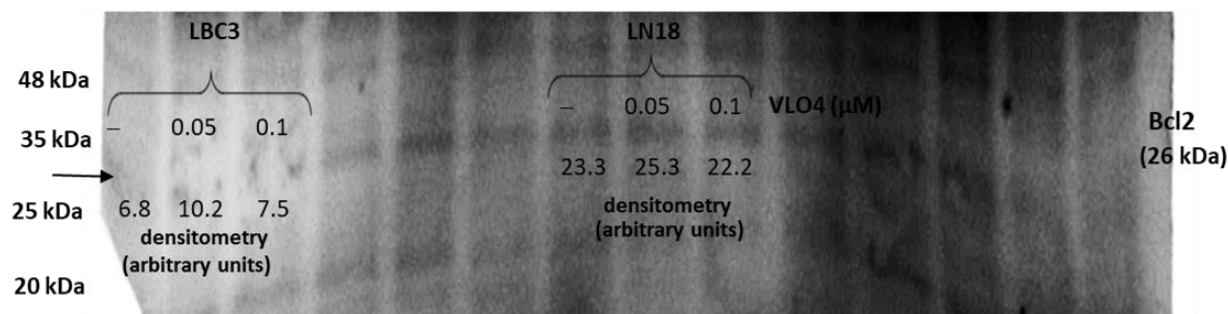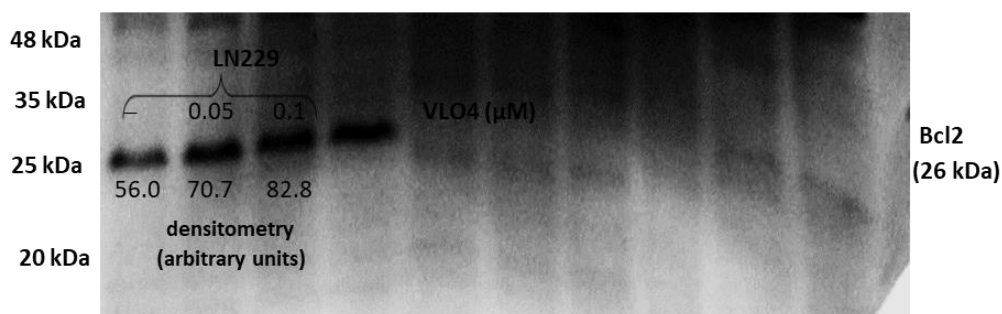

molecular weight marker

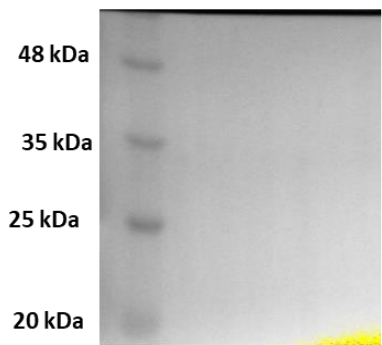



(B)

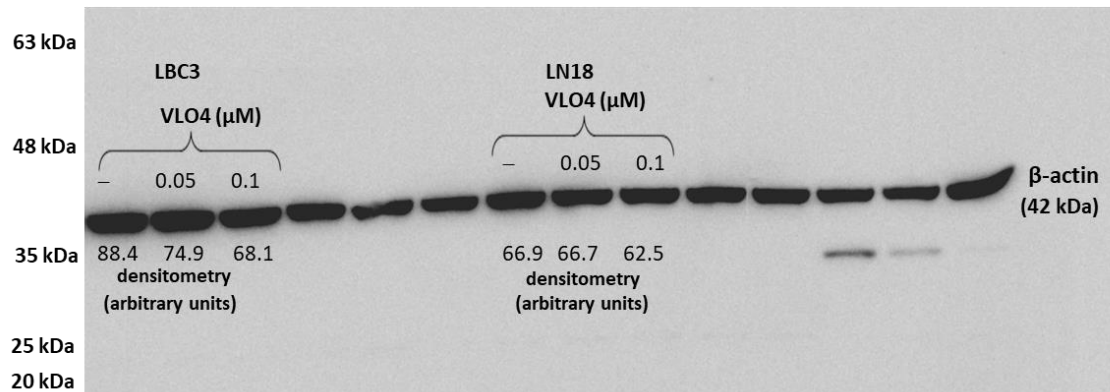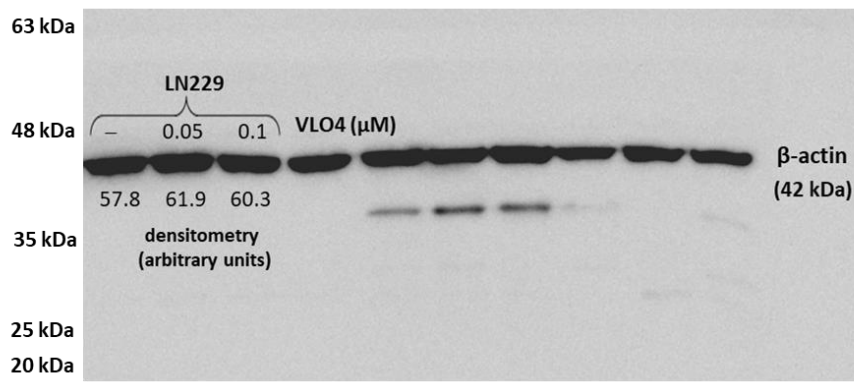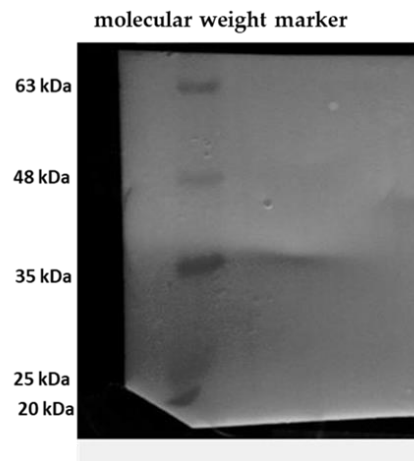

**Figure S8.** For Figure 8d, Western blot of Bcl-xL (A) and  $\beta$ -actin (B) in glioblastoma cell lines LBC3, LN18 and LN229 treated with VLO4 disintegrin. Densitometry values of the protein bands and the molecular weight markers are shown.

(A)

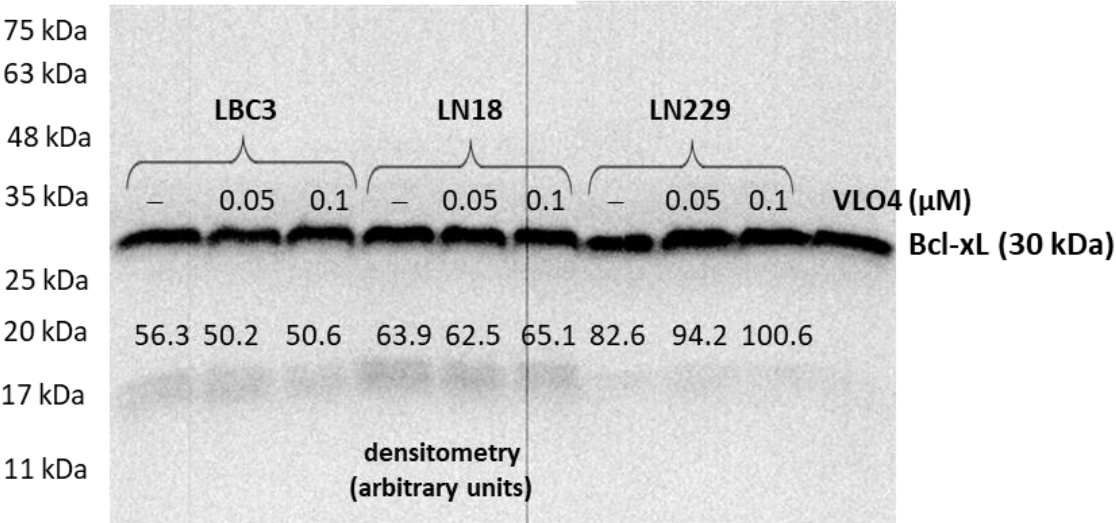

molecular weight marker

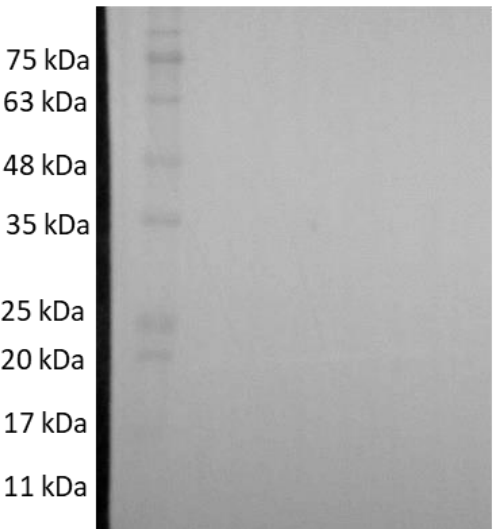

(B)

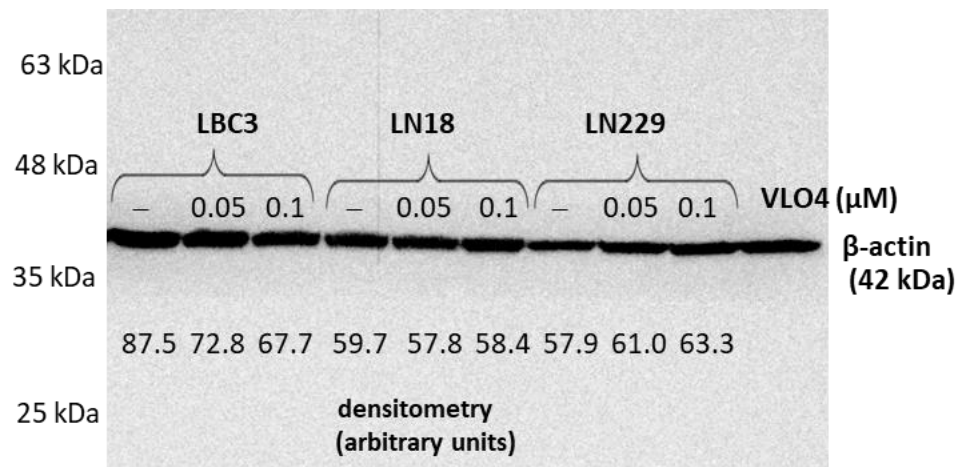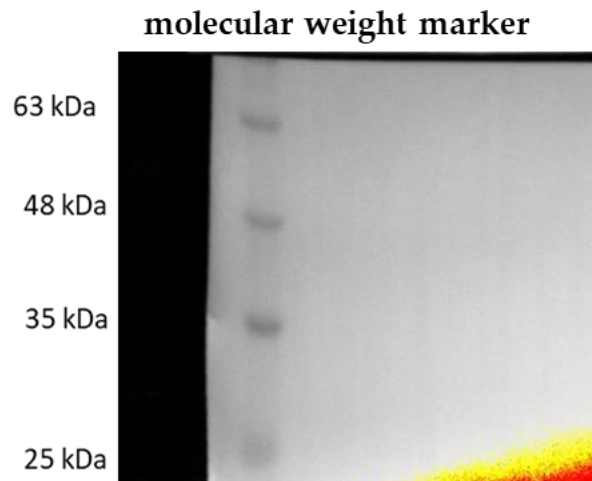

**Figure S9. For Figure 6, Gelatin zymography.** MMPs were assayed in the medium of glioblastoma cell lines LBC3, LN18 and LN229 treated with VLO4 disintegrin. MMPs are indicated as pro-MMP-2, active MMP-2, active MMP-9 and MMP complexes (130 and 240 kDa). The molecular weight standard (kDa) and densitometry values are shown.

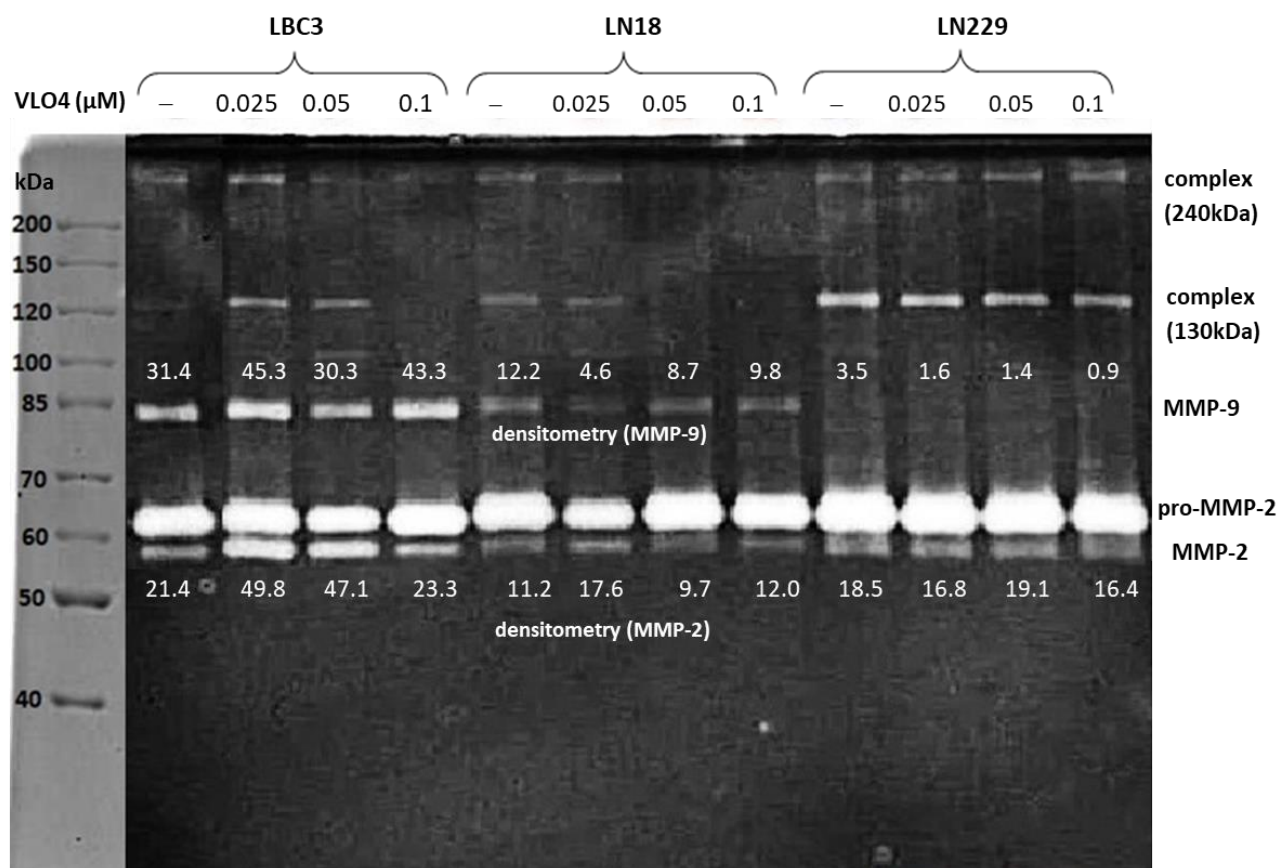

**Figure S10. For Figures 1d and 4b, Western blot of integrin subunits.**

The molecular weight markers and densitometry values are shown.

**Figure 1d**

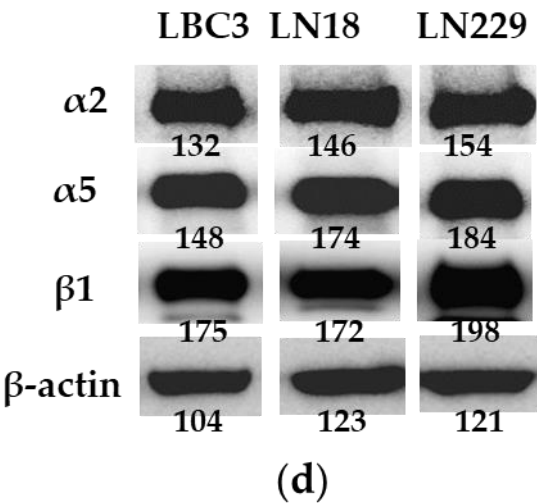

**Figure 4b**

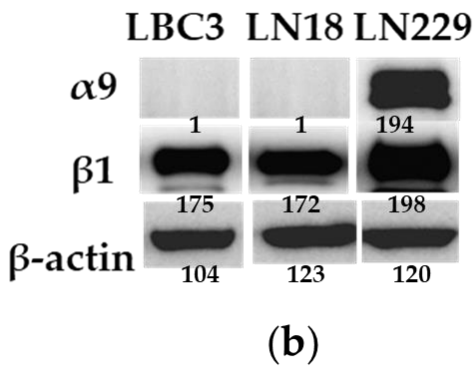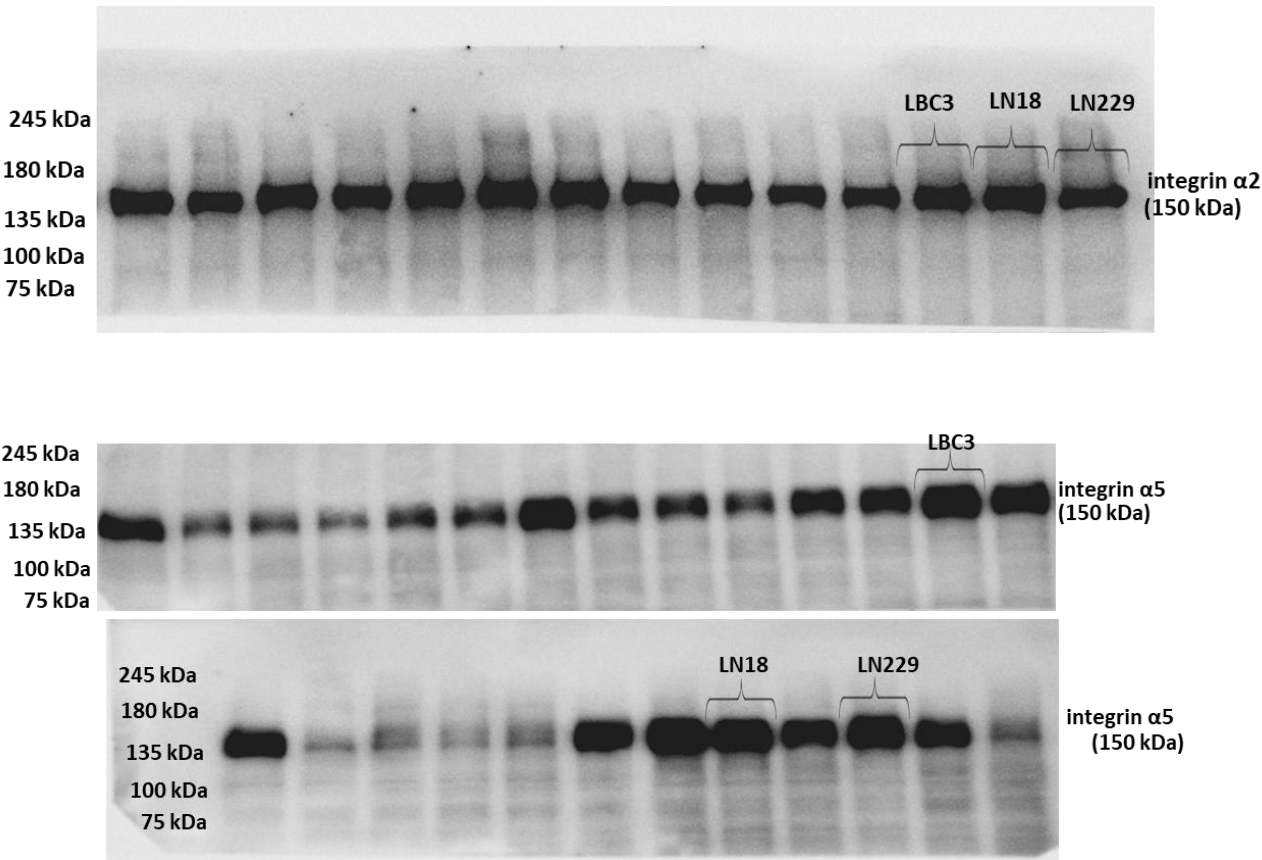

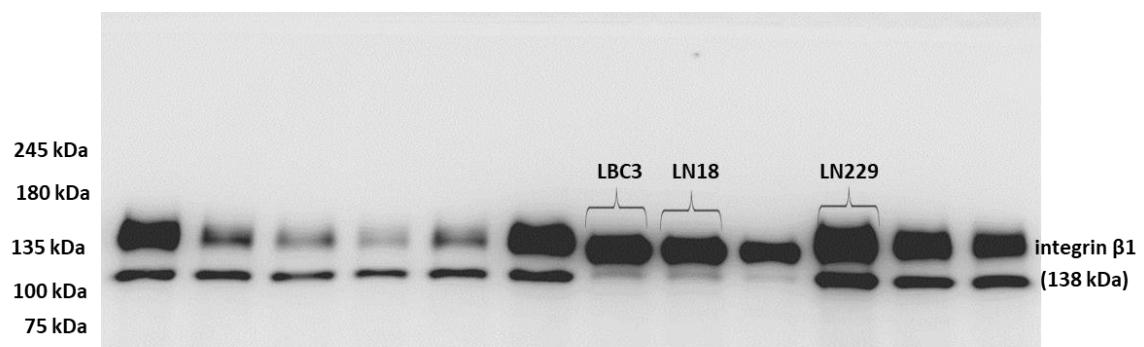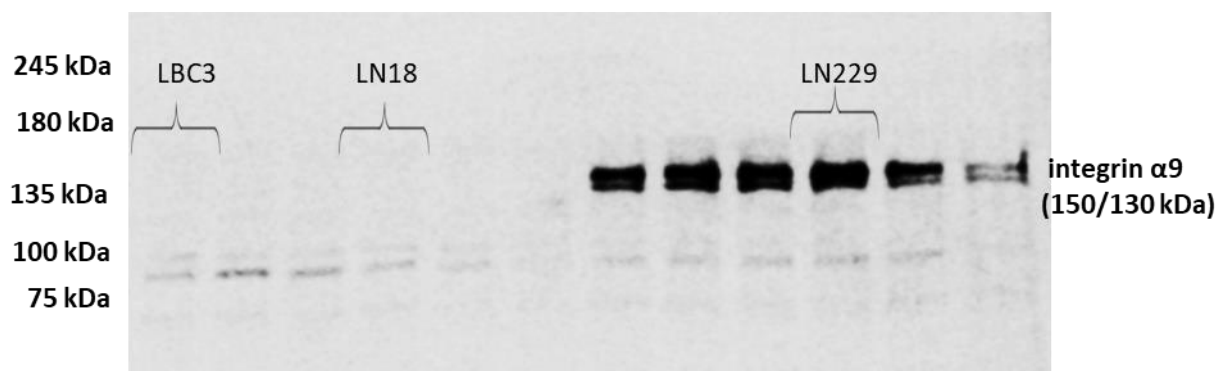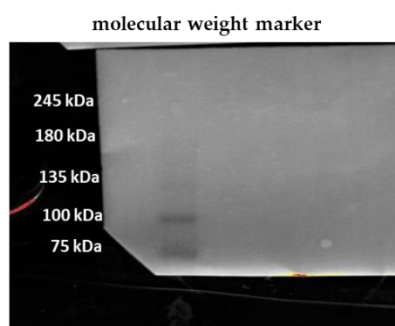

Supplement: s1 [file s1]
